# Supplementary material for: Multi-fold enhancement in sustainable production of biomass, lipids and biodiesel from oleaginous yeast: an artificial neural network-genetic algorithm approach
Source: Royal Society of Chemistry journal article supplement (doi:10.1039/d0se00922a), 2020-01-01
Supplement: d0se00922a1.pdf [file d0se00922a1.pdf]

## SUPPORTING INFORMATION

### Multi-fold enhancement in sustainable production of biomass, lipid and biodiesel from oleaginous yeast: An artificial neural network – genetic algorithm approach

RaviRanjan Kumar<sup>a</sup>, Gunaseelan Dhanarajan<sup>a</sup>, Debasis Sarkar<sup>b</sup> and Ramkrishna Sen<sup>a\*</sup>

<sup>a</sup> Department of Biotechnology, Indian Institute of Technology Kharagpur, West Bengal-721302, India

<sup>b</sup> Department of Chemical Engineering, Indian Institute of Technology Kharagpur, West Bengal-721302, India

\*Corresponding author: rksen@yahoo.com ; Tel: +91-3222-283752

**Table A1.**  
Range and levels of experimental independent variables

| Independent Variable                 | Level |      |     |      |     |
|--------------------------------------|-------|------|-----|------|-----|
|                                      | -2    | -1   | 0   | +1   | +2  |
| Glycerol (g/L)                       | 0     | 25   | 50  | 75   | 100 |
| Ammonium Chloride (g/L)              | 1     | 1.75 | 2.5 | 3.25 | 4   |
| Magnesium Sulfate (g/L)              | 0.2   | 0.5  | 0.8 | 1.1  | 1.4 |
| Potassium Dihydrogen Phosphate (g/L) | 0.4   | 0.8  | 1.2 | 1.6  | 2   |

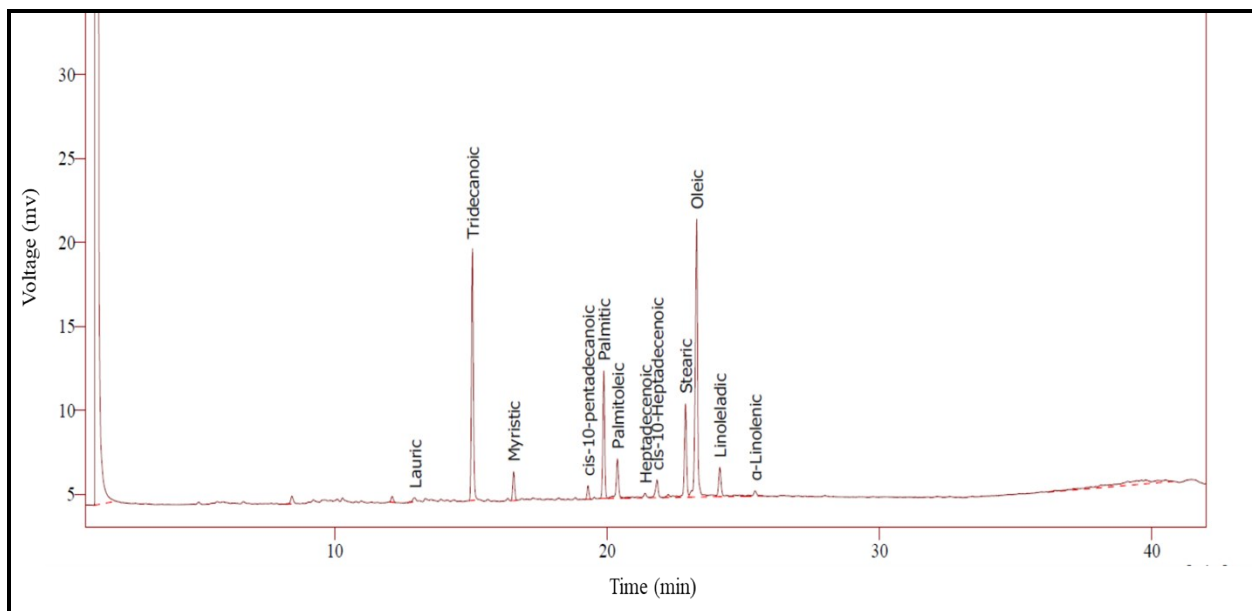

**Figure S1.** GC chromatogram of FAME obtained from optimized media
